# Supplementary material
Source: MDPI journal article supplement (https://www.mdpi.com/2079-9284/10/6/164)
Supplement: s1 [file s1]

## Supplementary data

# Anti-Obesity Effect of Daidzein Derived from *Pachyrhizus erosus* (L.) Urb. Extract via Leptin-PPAR-FAS Pathway in MDI-Induced 3T3-L1 Cell line

Moon-Hee Choi <sup>1</sup>, Seung-hwa Yang <sup>2</sup>, Yeo-Jin Lee <sup>2</sup>, Jeong Ho Sohn <sup>3</sup>, Ki Sun Lee <sup>3</sup>, and Hyun-Jae Shin <sup>1,2,\*</sup>

## Figure captions

**Figure S1.** LC-MS/MS profile of the *P. erosus* 70% EtOH extract.

**Figure S2.** LC-MS/MS profile of the EtOAc fraction from *P. erosus* 70% EtOH extract.

## Supplementary Figures

Figure S1.

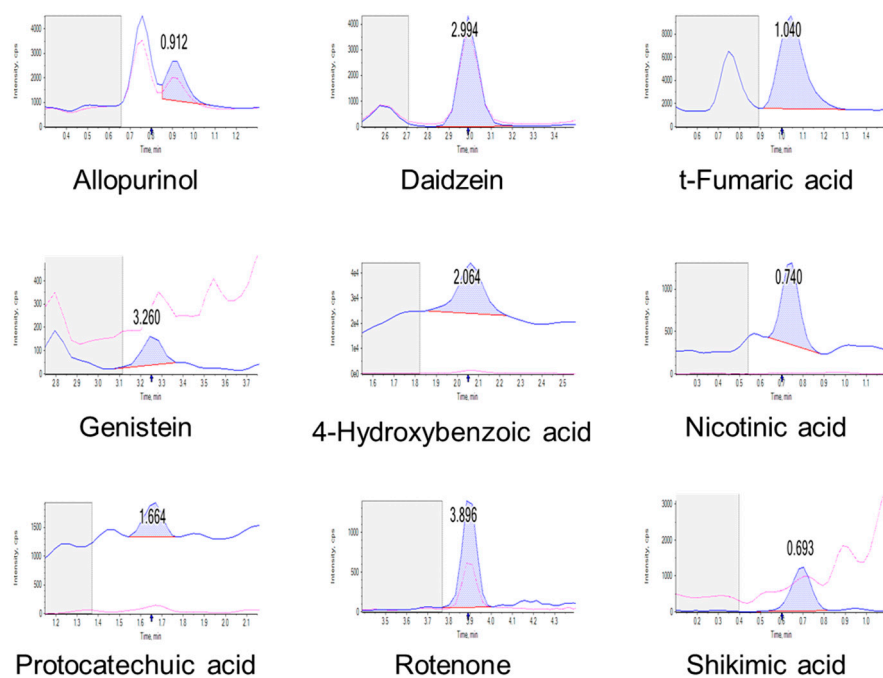

**Figure S1.** LC-MS/MS profile of the *P. erosus* 70% EtOH extract. The color and arrow mean the position and integral area for calculating the content and the arrow. The number on the curve means the retention time.

**Figure S2.**

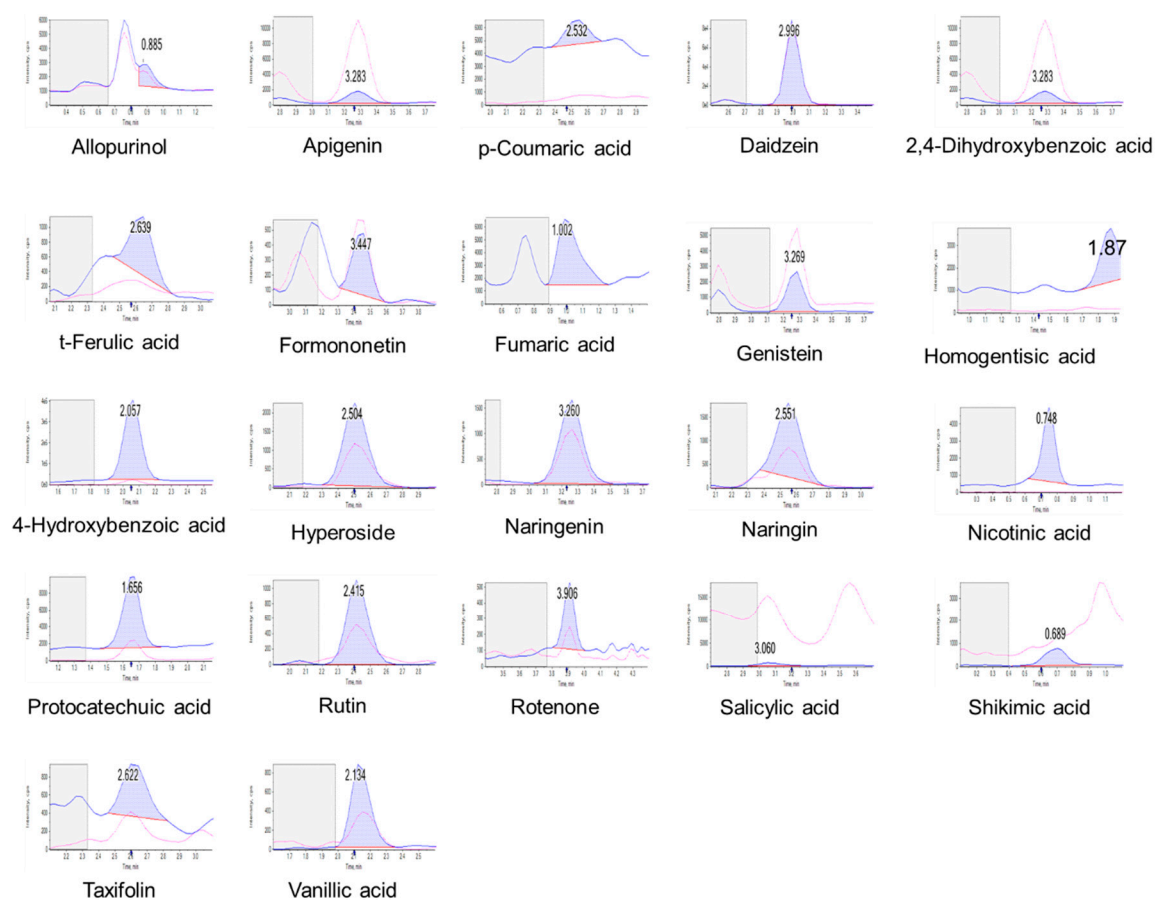

**Figure S2.** LC-MS/MS profile of the EtOAc fraction from *P. erosus* 70% EtOH extract. The color and arrow mean the position and integral area for calculating the content and the arrow. The number on the curve means the retention time.
